# Supplementary material for: Tumor co-expression of progranulin and sortilin as a prognostic biomarker in breast cancer
Source: PubMed Central journal article supplement (PMC7898426; doi:10.1186/s12885-021-07854-0), 2021-02-22
Supplement: 12885_2021_7854_MOESM5_ESM.pdf [file 12885_2021_7854_MOESM5_ESM.pdf]

## **Additional file 5: Supplementary Material**

**Figure S1: CONSORT diagram for the study.**

**Figure S2: ER $\alpha$  positive patients stratified by treatment arm.**

**Figure S3: Patients with high tumor co-expression of progranulin and sortilin have worse breast cancer-specific survival.**

**Figure S4: Patients with high tumor co-expression of progranulin and sortilin have worse breast cancer-specific survival in the ER $\alpha$  positive patient group treated with tamoxifen.**

**Table S1: Distribution of progranulin scores according to clinicopathological parameters in the cohort.**

**Table S2: Distribution of sortilin expression according to clinicopathological parameters in the cohort.**

**Table S3: Cross table.**

**Table S4: Cox regression analysis on randomized untreated patients with high progranulin tumor tissue expression.**

**Table S5: Cox regression analysis on all patients.**

**Table S6: Distribution of co-expression of progranulin and sortilin according to clinicopathological parameters in the cohort.**

**Table S7: Cox regression analysis on ER $\alpha$  positive patients.**

## Supplementary Figures and Legends

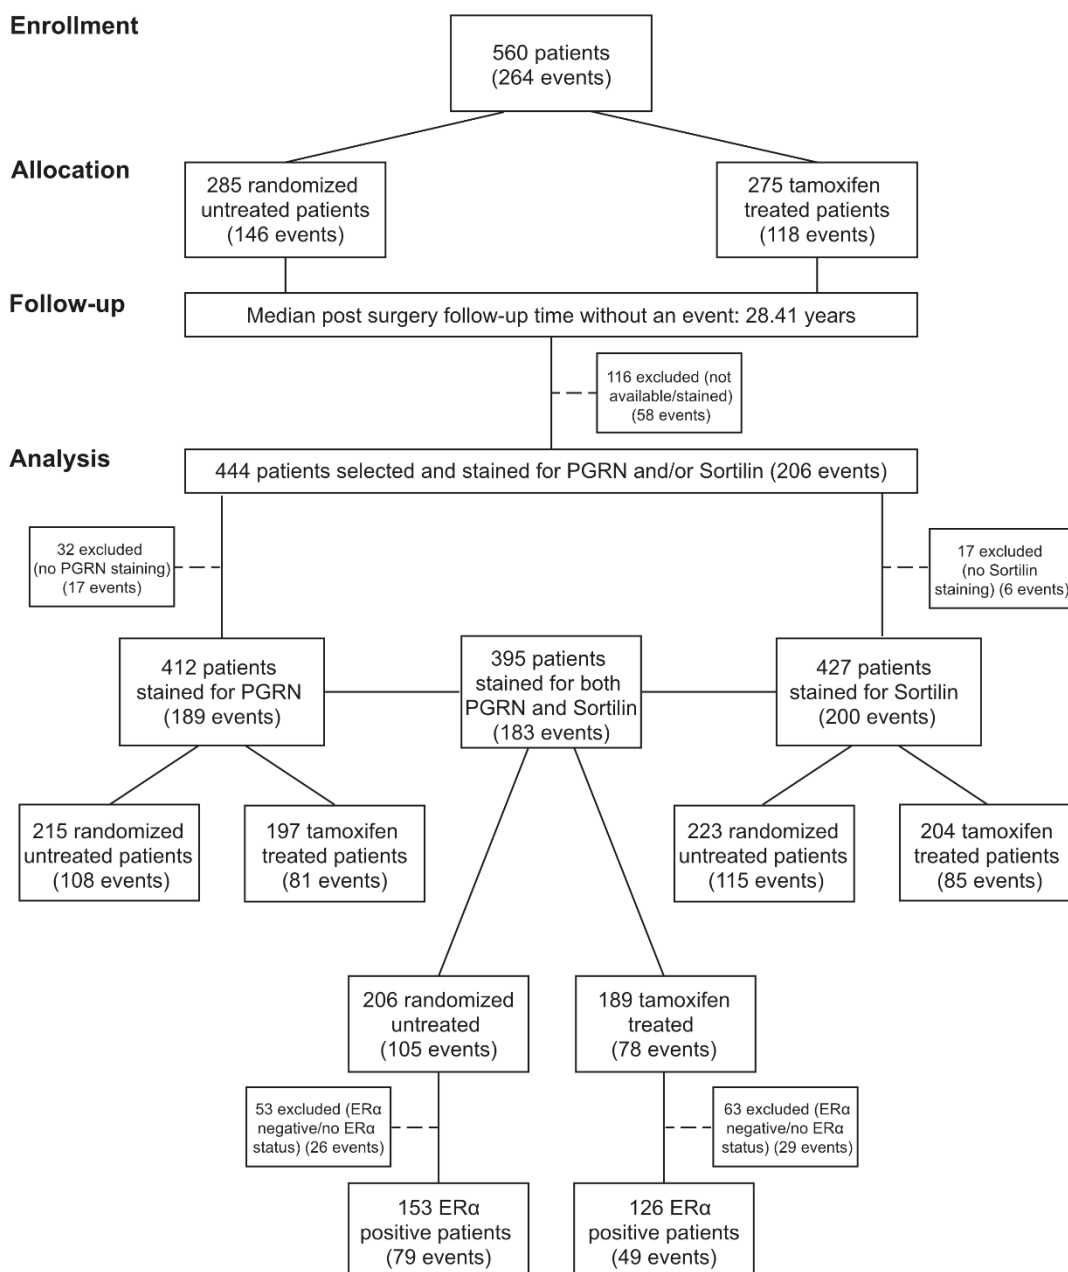

**Figure S1: CONSORT diagram for the study.** 560 premenopausal breast cancer patients were enrolled in the study and randomized to either two years of tamoxifen treatment or no systemic treatment. TMAs were constructed and stained for progranulin and sortilin expression using IHC and specific antibodies. Patients were followed-up for breast

cancer-specific survival where an event is defined as death from breast cancer. TMA: tissue microarray, IHC: immunohistochemistry, ER $\alpha$ : estrogen receptor alpha PGRN: progranulin.

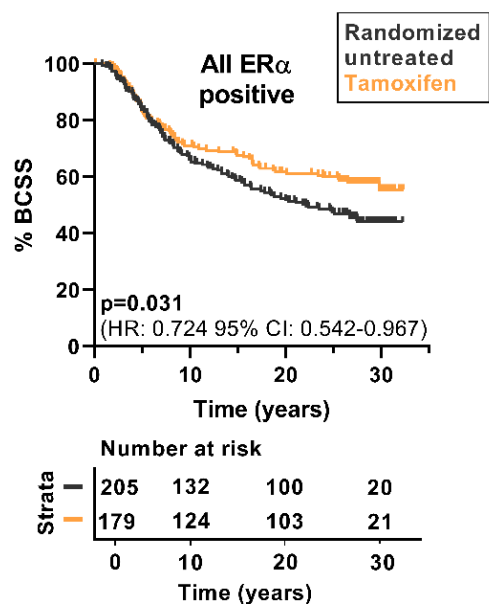

**Figure S2: ER $\alpha$  positive patients stratified by treatment arm.** Kaplan-Meier estimates showing breast cancer-specific survival in all ER $\alpha$  positive breast cancer patients from the cohort according to treatment arm (n=384). The statistical differences between the curves, as well as HR and 95% CI were estimated by the log-rank test. BCSS: breast cancer-specific survival, HR: hazard ratio, CI: confidence interval.

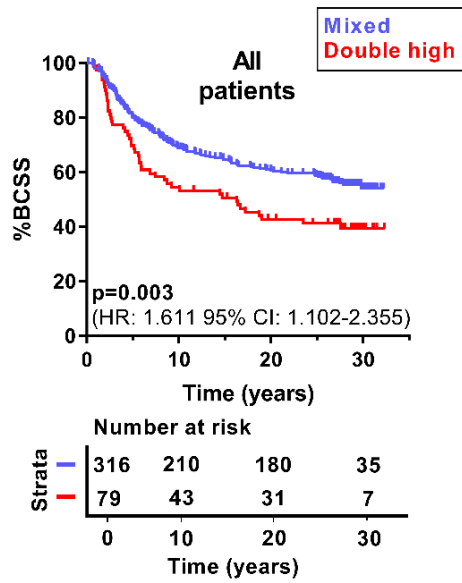

**Figure S3: Patients with high tumor co-expression of progranulin and sortilin have worse**

**breast cancer-specific survival.** Kaplan-Meier curves illustrating breast cancer-specific survival on combined progranulin and sortilin expression, making a double high group (high progranulin, high sortilin expression) against all other combinations (of low/high progranulin/sortilin expression) in all patients (n=395). The statistical differences between the curves, as well as HR and 95% CI were estimated by the log-rank test. BCSS: breast cancer-specific survival, HR: hazard ratio, CI: confidence interval, PGRN: progranulin, SORT: sortilin.

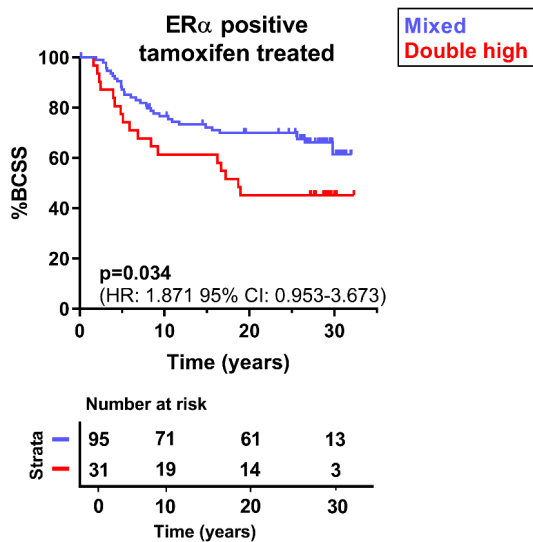

**Figure S4: Patients with high tumor co-expression of progranulin and sortilin have worse breast cancer-specific survival in the ER $\alpha$  positive patient group treated with tamoxifen.**

Kaplan-Meier curves illustrating breast cancer-specific survival in ER $\alpha$  positive patients treated with tamoxifen. BCSS in the double high group (high progranulin, high sortilin expression) against all other combinations (mixed group) ( $n=126$ ). The statistical differences between the curves, as well as HR and 95% CI were estimated by the log-rank test. BCSS: breast cancer-specific survival, HR: hazard ratio, CI: confidence interval, PGRN: progranulin, SORT: sortilin.

## Supplementary Tables and Legends

**Table S1: Distribution of progranulin scores according to clinicopathological parameters in the cohort.**

| Progranulin expression                     | 1<br>(n=113) | 2<br>(n=160) | 3<br>(n=123) | 4<br>(n=16) | Value               | P-value          |
|--------------------------------------------|--------------|--------------|--------------|-------------|---------------------|------------------|
| <b>Randomization</b>                       |              |              |              |             |                     |                  |
| Untreated                                  | 60 (53)      | 89 (56)      | 58 (47)      | 8 (50)      |                     |                  |
| Tamoxifen                                  | 53 (47)      | 71 (44)      | 65 (53)      | 8 (50)      | 2.075 <sup>1</sup>  | 0.557            |
| Missing: 0                                 |              |              |              |             |                     |                  |
| <b>Age at diagnosis (year, continuous)</b> |              |              |              |             |                     |                  |
| Median                                     | 44.00        | 45.00        | 46.00        | 43.00       |                     |                  |
| Range                                      | 25-55        | 31-57        | 26-57        | 35-52       | 6.515 <sup>2</sup>  | 0.089            |
| Missing: 0                                 |              |              |              |             |                     |                  |
| <b>Tumor size (mm, continuous)</b>         |              |              |              |             |                     |                  |
| Median                                     | 23.00        | 24.00        | 23.00        | 27.00       |                     |                  |
| Range                                      | 7-58         | 2-75         | 2-50         | 8-50        | 2.147 <sup>2</sup>  | 0.542            |
| Missing: 1                                 |              |              |              |             |                     |                  |
| <b>Tumor histology</b>                     |              |              |              |             |                     |                  |
| Ductal                                     | 87 (77)      | 143 (89)     | 106 (86)     | 11 (69)     |                     |                  |
| Lobular                                    | 21 (19)      | 4 (3)        | 4 (33)       | 0 (0)       |                     |                  |
| Medullar                                   | 1 (1)        | 6 (4)        | 10 (81)      | 4 (25)      | 50.897 <sup>1</sup> | <b>&lt;0.001</b> |
| Missing: 15                                |              |              |              |             |                     |                  |
| <b>Tumor grade</b>                         |              |              |              |             |                     |                  |
| Grade 1                                    | 22 (20)      | 24 (15)      | 5 (4)        | 1 (6)       |                     |                  |
| Grade 2                                    | 59 (52)      | 68 (43)      | 35 (29)      | 5 (31)      |                     |                  |
| Grade 3                                    | 29 (26)      | 61 (38)      | 78 (63)      | 10 (63)     | 43.126 <sup>1</sup> | <b>&lt;0.001</b> |
| Missing: 15                                |              |              |              |             |                     |                  |
| <b>LN status</b>                           |              |              |              |             |                     |                  |
| LN positive                                | 82 (73)      | 108 (68)     | 89 (72)      | 10 (63)     |                     |                  |
| LN negative                                | 31 (27)      | 50 (31)      | 34 (28)      | 6 (37)      | 4.445 <sup>1</sup>  | 0.617            |
| Missing: 2                                 |              |              |              |             |                     |                  |
| <b>ER<math>\alpha</math></b>               |              |              |              |             |                     |                  |
| ER $\alpha$ positive (>10%)                | 94 (83)      | 116 (73)     | 72 (59)      | 8 (50)      |                     |                  |
| ER $\alpha$ negative (<10%)                | 12 (11)      | 33 (21)      | 40 (33)      | 7 (44)      | 22.220 <sup>1</sup> | <b>&lt;0.001</b> |
| Missing: 30                                |              |              |              |             |                     |                  |
| <b>PR</b>                                  |              |              |              |             |                     |                  |
| PR positive (>10%)                         | 64 (57)      | 87 (54)      | 52 (42)      | 3 (19)      |                     |                  |
| PR negative (<10%)                         | 24 (21)      | 42 (26)      | 45 (37)      | 9 (56)      | 15.797              | <b>0.001</b>     |

|                                |         |          |          |          |                     |              |
|--------------------------------|---------|----------|----------|----------|---------------------|--------------|
| Missing: 86                    |         |          |          |          |                     |              |
| <b>HER2</b>                    |         |          |          |          |                     |              |
| HER2 negative                  | 91 (81) | 125 (78) | 100 (81) | 15 (94)  |                     |              |
| HER2 positive                  | 14 (12) | 26 (16)  | 18 (15)  | 0 (0)    | 3.479 <sup>1</sup>  | 0.323        |
| Missing: 23                    |         |          |          |          |                     |              |
| <b>Ki67</b>                    |         |          |          |          |                     |              |
| <25%                           | 81 (72) | 106 (66) | 68 (55)  | 8 (50)   |                     |              |
| >25%                           | 15 (13) | 35 (22)  | 41 (33)  | 7 (44)   | 15.758 <sup>1</sup> | <b>0.001</b> |
| Missing: 51                    |         |          |          |          |                     |              |
| <b>Sortilin expression</b>     |         |          |          |          |                     |              |
| 1                              | 33 (29) | 25 (16)  | 25 (20)  | 2 (12.5) |                     |              |
| 2                              | 26 (23) | 47 (29)  | 26 (21)  | 3 (19)   |                     |              |
| 3                              | 35 (31) | 66 (41)  | 54 (44)  | 9 (56)   |                     |              |
| 4                              | 11 (10) | 17 (11)  | 14 (11)  | 2 (12.5) | 0.112 <sup>3</sup>  | <b>0.026</b> |
| Missing: 17                    |         |          |          |          |                     |              |
| <b>HIF1<math>\alpha</math></b> |         |          |          |          |                     |              |
| 0-1%                           | 73 (65) | 99 (62)  | 63 (51)  | 10 (63)  |                     |              |
| 1-10%                          | 6 (5)   | 16 (10)  | 24 (20)  | 0 (0)    |                     |              |
| 10-100%                        | 2 (2)   | 12 (8)   | 12 (10)  | 2 (33)   | 21.453 <sup>1</sup> | <b>0.002</b> |
| Missing: 93                    |         |          |          |          |                     |              |

<sup>1</sup> Pearson's Chi-square

<sup>2</sup> Kruskal-Wallis (continuous variables)

<sup>3</sup> Spearman

(LN: lymph node, ER $\alpha$ : estrogen receptor alpha, PR: progesterone receptor, HER2: human epidermal growth factor receptor 2, Ki67: proliferation marker, HIF1 $\alpha$ : hypoxia-inducible factor 1-alpha, percentages in parenthesis. P-values below 0.05 were considered statistically significant and highlighted)

**Table S2: Distribution of sortilin expression according to clinicopathological parameters in the cohort.**

| Sortilin expression                        | 1<br>(n=92) | 2<br>(n=110) | 3<br>(n=177) | 4<br>(n=48) | Value               | P-value          |
|--------------------------------------------|-------------|--------------|--------------|-------------|---------------------|------------------|
| <b>Randomization</b>                       |             |              |              |             |                     |                  |
| Untreated                                  | 46 (50)     | 61 (55)      | 93 (53)      | 23 (48)     |                     |                  |
| Tamoxifen                                  | 46 (50)     | 49 (45)      | 84 (47)      | 25 (52)     | 1.007 <sup>1</sup>  | 0.800            |
| Missing: 0                                 |             |              |              |             |                     |                  |
| <b>Age at diagnosis (year, continuous)</b> |             |              |              |             |                     |                  |
| Median                                     | 46.00       | 45.00        | 44.00        | 44.50       |                     |                  |
| Range                                      | 25-57       | 31-56        | 30-57        | 26-51       | 8.289 <sup>2</sup>  | <b>0.040</b>     |
| Missing: 0                                 |             |              |              |             |                     |                  |
| <b>Tumor size (mm, continuous)</b>         |             |              |              |             |                     |                  |
| Median                                     | 25.00       | 23.50        | 23.00        | 25.00       |                     |                  |
| Range                                      | 8-58        | 2-45         | 2-50         | 7-75        | 0.369 <sup>2</sup>  | 0.946            |
| Missing: 1                                 |             |              |              |             |                     |                  |
| <b>Tumor histology</b>                     |             |              |              |             |                     |                  |
| Ductal                                     | 64 (70)     | 92 (84)      | 160 (90)     | 43 (90)     |                     |                  |
| Lobular                                    | 15 (16)     | 8 (7)        | 7 (4)        | 2 (4)       |                     |                  |
| Medullar                                   | 8 (9)       | 8 (7)        | 5 (3)        | 0 (0)       | 24.586 <sup>1</sup> | <b>&lt;0.001</b> |
| Missing: 15                                |             |              |              |             |                     |                  |
| <b>Tumor grade</b>                         |             |              |              |             |                     |                  |
| Grade 1                                    | 12 (13)     | 12 (11)      | 21 (12)      | 8 (17)      |                     |                  |
| Grade 2                                    | 38 (41)     | 39 (35)      | 77 (44)      | 22 (46)     |                     |                  |
| Grade 3                                    | 37 (40)     | 58 (53)      | 71 (40)      | 17 (35)     | 5.665 <sup>1</sup>  | 0.462            |
| Missing: 15                                |             |              |              |             |                     |                  |
| <b>LN status</b>                           |             |              |              |             |                     |                  |
| LN Positive                                | 69 (75)     | 78 (71)      | 122 (69)     | 30 (63)     |                     |                  |
| LN Negative                                | 22 (25)     | 32 (29)      | 54 (30)      | 18 (37)     | 4.364 <sup>1</sup>  | 0.627            |
| Missing: 2                                 |             |              |              |             |                     |                  |
| <b>ER<math>\alpha</math></b>               |             |              |              |             |                     |                  |
| ER $\alpha$ positive (>10%)                | 55 (60)     | 73 (66)      | 134 (76)     | 44 (92)     |                     |                  |
| ER $\alpha$ negative (<10%)                | 25 (27)     | 28 (26)      | 38 (21)      | 2 (4)       | 13.317 <sup>1</sup> | <b>0.004</b>     |
| Missing: 28                                |             |              |              |             |                     |                  |
| <b>PR</b>                                  |             |              |              |             |                     |                  |
| PR positive (>10%)                         | 35 (38)     | 45 (41)      | 103 (58)     | 36 (75)     |                     |                  |
| PR negative (<10%)                         | 35 (38)     | 37 (34)      | 43 (24)      | 4 (8)       | 23.510 <sup>1</sup> | <b>&lt;0.001</b> |
| Missing: 89                                |             |              |              |             |                     |                  |
| <b>HER2</b>                                |             |              |              |             |                     |                  |
| HER2 negative                              | 74 (80)     | 91 (83)      | 140 (79)     | 39 (81)     |                     |                  |
| HER2 positive                              | 13 (14)     | 15 (14)      | 29 (16)      | 3 (6)       | 2.727 <sup>1</sup>  | 0.436            |



|                                |         |         |          |         |                    |              |
|--------------------------------|---------|---------|----------|---------|--------------------|--------------|
| Missing: 23                    |         |         |          |         |                    |              |
| <b>Ki67</b>                    |         |         |          |         |                    |              |
| <25%                           | 60 (65) | 70 (64) | 112 (63) | 30 (63) |                    |              |
| >25%                           | 21 (23) | 25 (23) | 44 (25)  | 11 (23) | 0.184 <sup>1</sup> | 0.980        |
| Missing: 54                    |         |         |          |         |                    |              |
| <b>Progranulin expression</b>  |         |         |          |         |                    |              |
| 1                              | 33 (36) | 26 (24) | 35 (20)  | 11 (23) |                    |              |
| 2                              | 25 (27) | 47 (43) | 66 (37)  | 17 (35) |                    |              |
| 3                              | 25 (27) | 26 (24) | 54 (31)  | 14 (29) |                    |              |
| 4                              | 2 (2)   | 3 (3)   | 9 (5)    | 2 (4)   | 0.112 <sup>3</sup> | <b>0.026</b> |
| Missing: 32                    |         |         |          |         |                    |              |
| <b>HIF1<math>\alpha</math></b> |         |         |          |         |                    |              |
| 0-1%                           | 50 (54) | 69 (63) | 102 (58) | 34 (71) |                    |              |
| 1-10%                          | 12 (13) | 8 (7)   | 25 (14)  | 4 (8)   |                    |              |
| 10-100%                        | 7 (8)   | 11 (10) | 8 (5)    | 1 (2)   | 9.512 <sup>1</sup> | 0.147        |
| Missing: 96                    |         |         |          |         |                    |              |

<sup>1</sup> Pearson's Chi-square

<sup>2</sup> Kruskal-Wallis (continuous variables)

<sup>3</sup> Spearman

(LN: lymph node, ER $\alpha$ : estrogen receptor alpha, PR: progesterone receptor, HER2: human epidermal growth factor receptor 2, Ki67: proliferation marker, HIF1 $\alpha$ : hypoxia-inducible factor 1-alpha, percentages in parenthesis. P-values below 0.05 were considered statistically significant and highlighted)

**Table S3: Cross table.** Cross table showing the relationship between progranulin and sortilin expression in the patient cohort.

| <b>Distribution of progranulin and sortilin expression</b> |                         |              |                          |              |                  |
|------------------------------------------------------------|-------------------------|--------------|--------------------------|--------------|------------------|
|                                                            | <b>Sortilin low (%)</b> | <b>Group</b> | <b>Sortilin high (%)</b> | <b>Group</b> | <b>Total (%)</b> |
| <b>Progranulin low</b>                                     | 131 (33.16)             | 1            | 129 (32.66)              | 2            | 260              |
| <b>Progranulin high</b>                                    | 56 (14.18)              | 3            | 79 (20.00)               | 4            | 135              |
| <b>Total</b>                                               | 187                     |              | 208                      |              | 395 (100)        |

**Table S4: Cox regression analysis on randomized untreated patients with high progranulin**

**tumor tissue expression.** Multivariable interaction analysis on breast cancer-specific survival evaluating various prognostic parameters for relative risk estimation for the untreated patient cohort having high tumor expression of progranulin. Multivariable model adjusted for grade, lymph node status, tumor size, age, ER $\alpha$  and HER2 status, in addition to sortilin scoring. HR: hazard ratio, CI: confidence interval, LN: lymph node, ER $\alpha$ : estrogen receptor alpha, HER2: human epidermal growth factor receptor 2.

| Variable                     | Multivariable analysis |             |              |
|------------------------------|------------------------|-------------|--------------|
|                              | HR                     | 95% CI      | p            |
| <b>Grade</b>                 |                        |             |              |
| I-II                         | 1                      |             |              |
| III                          | 1.397                  | 0.531-3.673 | 0.498        |
| <b>LN status</b>             |                        |             |              |
| LN negative                  | 1                      |             |              |
| LN positive                  | 3.854                  | 1.666-8.919 | <b>0.002</b> |
| <b>Tumor size</b>            |                        |             |              |
| Continuous (mm)              | 1.089                  | 1.037-1.143 | <b>0.001</b> |
| <b>Age</b>                   |                        |             |              |
| Continuous (per year)        | 0.975                  | 0.920-1.143 | 0.393        |
| <b>ER<math>\alpha</math></b> |                        |             |              |
| ER $\alpha$ negative         | 1                      |             |              |
| ER $\alpha$ positive         | 1.877                  | 0.726-4.854 | 0.194        |
| <b>HER2</b>                  |                        |             |              |
| HER2 negative                | 1                      |             |              |
| HER2 positive                | 0.685                  | 0.238-1.969 | 0.482        |
| <b>Sortilin</b>              |                        |             |              |
| Low                          | 1                      |             |              |
| High                         | 3.013                  | 1.219-7.448 | <b>0.017</b> |

**Table S5: Cox regression analysis on all patients.** Univariate and multivariable interaction analysis on breast cancer-specific survival evaluating various prognostic parameters for relative risk estimation for all patients in the cohort. Multivariable model adjusted for grade, lymph node status, tumor size, age, treatment, ER $\alpha$  and HER2 status, in addition to the progranulin/sortilin scoring combination. HR: hazard ratio, CI: confidence interval, LN: lymph node, ER $\alpha$ : estrogen receptor alpha, HER2: human epidermal growth factor receptor 2.

| Variable                                | Univariate analysis |             |                  | Multivariable analysis |             |              |
|-----------------------------------------|---------------------|-------------|------------------|------------------------|-------------|--------------|
|                                         | HR                  | 95% CI      | p                | HR                     | 95% CI      | p            |
| <b>Grade</b>                            |                     |             |                  |                        |             |              |
| I-II                                    | 1                   |             |                  | 1                      |             |              |
| III                                     | 1.676               | 1.272-2.210 | <b>&lt;0.001</b> | 1.600                  | 1.109-2.307 | <b>0.012</b> |
| <b>LN status</b>                        |                     |             |                  |                        |             |              |
| LN negative                             | 1                   |             |                  | 1                      |             |              |
| LN positive                             | 1.520               | 1.102-2.096 | <b>0.011</b>     | 1.617                  | 1.118-2.338 | <b>0.011</b> |
| <b>Tumor size</b>                       |                     |             |                  |                        |             |              |
| Continuous (mm)                         | 1.014               | 1.000-1.028 | <b>0.044</b>     | 1.021                  | 1.005-1.037 | <b>0.010</b> |
| <b>Age</b>                              |                     |             |                  |                        |             |              |
| Continuous (per year)                   | 0.982               | 0.958-1.007 | 0.159            | 0.992                  | 0.964-1.021 | 0.583        |
| <b>Randomization group</b>              |                     |             |                  |                        |             |              |
| Untreated                               | 1                   |             |                  | 1                      |             |              |
| Tamoxifen                               | 0.788               | 0.598-1.038 | 0.091            | 0.710                  | 0.517-0.974 | <b>0.034</b> |
| <b>ER<math>\alpha</math></b>            |                     |             |                  |                        |             |              |
| ER $\alpha$ negative                    | 1                   |             |                  | 1                      |             |              |
| ER $\alpha$ positive                    | 0.749               | 0.539-1.041 | 0.085            | 0.942                  | 0.622-1.427 | 0.779        |
| <b>HER2</b>                             |                     |             |                  |                        |             |              |
| HER2 negative                           | 1                   |             |                  | 1                      |             |              |
| HER2 positive                           | 1.440               | 0.986-2.103 | 0.059            | 1.051                  | 0.672-1.644 | 0.827        |
| <b>Progranulin/sortilin combination</b> |                     |             |                  |                        |             |              |
| Mixed                                   | 1                   |             |                  | 1                      |             |              |
| Double high                             | 1.612               | 1.157-2.247 | <b>0.005</b>     | 1.723                  | 1.209-2.457 | <b>0.003</b> |

**Table S6: Distribution of co-expression of progranulin and sortilin according to clinicopathological parameters in the cohort.**

| Co-expression Progranulin/sortilin         | Double high (n=79) | Other (n=316) | Value                  | p-value      |
|--------------------------------------------|--------------------|---------------|------------------------|--------------|
| <b>Randomization</b>                       |                    |               |                        |              |
| Untreated                                  | 37 (47)            | 169 (53)      |                        |              |
| Tamoxifen                                  | 42 (53)            | 147 (47)      | 1.119 <sup>1</sup>     | 0.290        |
| Missing: 0                                 |                    |               |                        |              |
| <b>Age at diagnosis (year, continuous)</b> |                    |               |                        |              |
| Median                                     | 45.00              | 45.00         |                        |              |
| Range                                      | 26-57              | 25-57         | 12801.500 <sup>2</sup> | 0.724        |
| Missing: 0                                 |                    |               |                        |              |
| <b>Tumor size (mm, continuous)</b>         |                    |               |                        |              |
| Median                                     | 23.00              | 24.00         |                        |              |
| Range                                      | 2-50               | 2-75          | 12558.000 <sup>2</sup> | 0.898        |
| Missing: 1                                 |                    |               |                        |              |
| <b>Tumor histology</b>                     |                    |               |                        |              |
| Ductal                                     | 73 (92)            | 263 (83)      |                        |              |
| Lobular                                    | 0 (0)              | 26 (8)        |                        |              |
| Medullar                                   | 3 (4)              | 17 (5)        | 7.465 <sup>1</sup>     | <b>0.024</b> |
| Missing: 13                                |                    |               |                        |              |
| <b>Tumor grade</b>                         |                    |               |                        |              |
| Grade 1                                    | 5 (6)              | 46 (15)       |                        |              |
| Grade 2                                    | 29 (37)            | 128 (41)      |                        |              |
| Grade 3                                    | 42 (13)            | 131 (42)      | 5.532 <sup>1</sup>     | 0.063        |
| Missing: 14                                |                    |               |                        |              |
| <b>LN status</b>                           |                    |               |                        |              |
| LN Positive                                | 55 (70)            | 223 (71)      |                        |              |
| LN Negative                                | 24 (30)            | 91 (28)       | 0.562 <sup>1</sup>     | 0.755        |
| Missing: 2                                 |                    |               |                        |              |
| <b>ER<math>\alpha</math></b>               |                    |               |                        |              |
| ER $\alpha$ positive (>10%)                | 55 (70)            | 224 (71)      |                        |              |
| ER $\alpha$ negative (<10%)                | 21 (27)            | 68 (22)       | 0.621 <sup>1</sup>     | 0.431        |
| Missing: 27                                |                    |               |                        |              |
| <b>PR</b>                                  |                    |               |                        |              |
| PR positive (>10%)                         | 42 (53)            | 153 (48)      |                        |              |
| PR negative (<10%)                         | 23 (29)            | 92 (29)       | 0.103 <sup>1</sup>     | 0.748        |
| Missing: 85                                |                    |               |                        |              |
| <b>HER2</b>                                |                    |               |                        |              |
| HER2 negative                              | 66 (84)            | 251 (79)      |                        |              |
| HER2 positive                              | 10 (13)            | 48 (15)       | 0.389 <sup>1</sup>     | 0.533        |

|                                |         |          |                    |       |
|--------------------------------|---------|----------|--------------------|-------|
| Missing: 20                    |         |          |                    |       |
| <b>Ki67</b>                    |         |          |                    |       |
| <25%                           | 46 (58) | 207 (66) |                    |       |
| >25%                           | 26 (33) | 70 (22)  | 3.368 <sup>1</sup> | 0.066 |
| Missing: 46                    |         |          |                    |       |
| <b>HIF1<math>\alpha</math></b> |         |          |                    |       |
| 0-1%                           | 44 (56) | 194 (61) |                    |       |
| 1-10%                          | 13 (17) | 32 (10)  |                    |       |
| 10-100%                        | 5 (6)   | 21 (7)   | 2.565 <sup>1</sup> | 0.277 |
| Missing: 86                    |         |          |                    |       |

<sup>1</sup> Pearson's Chi-square

<sup>2</sup> Mann-Whitney U Test (continuous variables)

<sup>3</sup> Spearman

(LN: lymph node, ER $\alpha$ : estrogen receptor alpha, PR: progesterone receptor, HER2: human epidermal growth factor receptor 2, Ki67: proliferation marker, HIF1 $\alpha$ : hypoxia-inducible factor 1-alpha, percentages in parenthesis. P-values below 0.05 were considered statistically significant and highlighted)

**Table S7: Cox regression analysis on ER $\alpha$  positive patients.** Multivariable regression analysis on breast cancer-specific survival evaluating various prognostic parameters for relative risk estimation for the ER $\alpha$  positive patient cohort. Multivariable model adjusted for grade, lymph node status, tumor size, age, treatment, HER2 status, as well as the progranulin/sortilin scoring combination. HR: hazard ratio, CI: confidence interval, LN: lymph node, ER $\alpha$ : estrogen receptor alpha, HER2: human epidermal growth factor receptor 2.

| Variable                                | Multivariable analysis |             |              |
|-----------------------------------------|------------------------|-------------|--------------|
|                                         | HR                     | 95% CI      | p            |
| <b>Grade</b>                            |                        |             |              |
| I-II                                    | 1                      |             |              |
| III                                     | 1.612                  | 1.086-2.394 | <b>0.018</b> |
| <b>LN status</b>                        |                        |             |              |
| LN negative                             | 1                      |             |              |
| LN positive                             | 1.453                  | 0.940-2.244 | 0.093        |
| <b>Tumor size</b>                       |                        |             |              |
| Continuous (mm)                         | 0.999                  | 0.980-1.019 | 0.940        |
| <b>Age</b>                              |                        |             |              |
| Continuous (per year)                   | 0.971                  | 0.939-1.005 | 0.093        |
| <b>Randomization group</b>              |                        |             |              |
| Untreated                               | 1                      |             |              |
| Tamoxifen                               | 0.628                  | 0.431-0.915 | <b>0.015</b> |
| <b>HER2</b>                             |                        |             |              |
| HER2 negative                           | 1                      |             |              |
| HER2 positive                           | 1.716                  | 1.027-2.867 | <b>0.039</b> |
| <b>Progranulin/sortilin combination</b> |                        |             |              |
| Mixed                                   | 1                      |             |              |
| Double high                             | 1.980                  | 1.308-2.996 | <b>0.001</b> |
